# Supplementary material for: In Silico and In Vitro Analysis of Major Cannabis-Derived Compounds as Fatty Acid Amide Hydrolase Inhibitors
Source: MDPI journal article supplement (doi:10.3390/molecules26010048), 2020-12-24
Supplement: s1 [file s1]

## Supplementary Materials

**Figure S1:** Overlay of MOE best pose (yellow) with the co-crystal structure of QK5 (green). The catalytic triad is shown as sticks: Lys142 is in red, Ser217 is in magenta and Ser241 is in cyan.

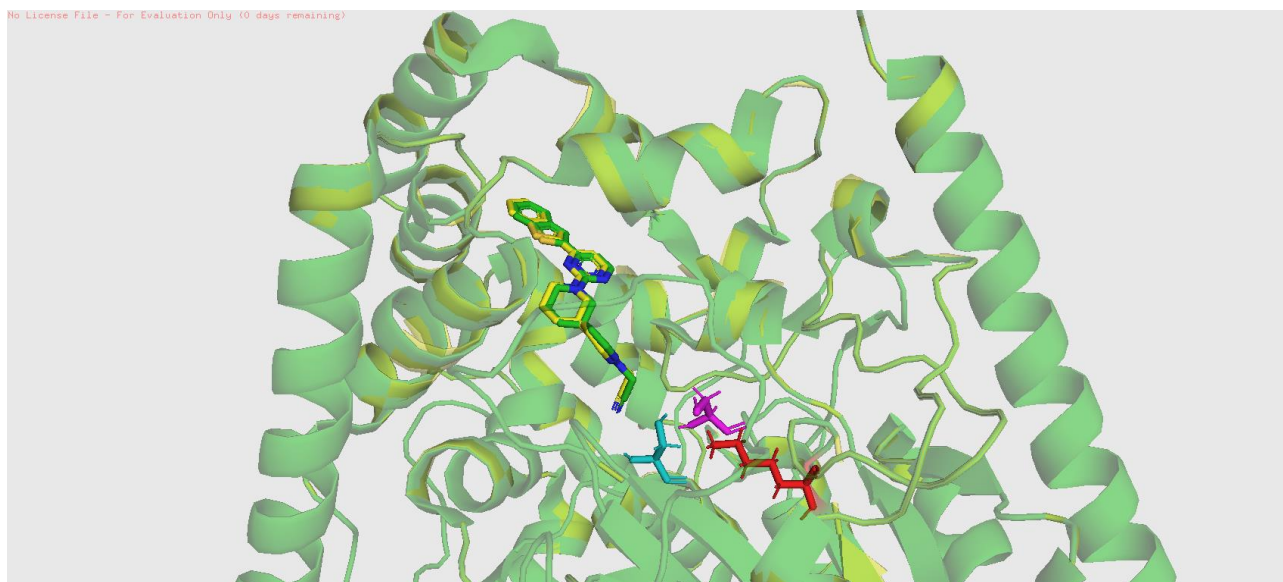

**Table S1**

Validation of comparative models

|             |         | Ramachandran Plot                         |                                       | Errat<br>(Overall<br>Quality<br>Factor) | Verify3D<br>(3D-1D<br>score >0.2%) | PROVE<br>(buried outlier protein<br>atoms total from Model1) |
|-------------|---------|-------------------------------------------|---------------------------------------|-----------------------------------------|------------------------------------|--------------------------------------------------------------|
|             |         | Residues in<br>most favored<br>region (%) | Residues in<br>disallow<br>region (%) |                                         |                                    |                                                              |
| SWISS-MODEL |         | 90.3                                      | 0.2                                   | 93.3333                                 | 91.72                              | 3.7                                                          |
| PHYRE2      |         | 89.3                                      | 0.4                                   | 87.7402                                 | 94.99                              | 5.5                                                          |
| MOE         |         | 86.2                                      | 0.0                                   | 91.7603                                 | 92.62                              | 3.0                                                          |
| MODELLER    | Model11 | 90.8                                      | 0.4                                   | 93..5185                                | 85.15                              | 5.0                                                          |
|             | Model4  | 9108                                      | 0.2                                   | 94.8529                                 | 87.39                              | 4.0                                                          |
